# Supplementary material for: Layer-by-Layer Fabrication of PAH/PAMAM/Nano-CaCO3 Composite Films and Characterization for Enhanced Biocompatibility
Source: Int J Biomater. 2022 Jul 31;2022:6331465. doi: 10.1155/2022/6331465 (PMC9467823; doi:10.1155/2022/6331465)
Supplement: Supplementary Materials — S1: SEM and TEM morphological characterizations of CaCO3 on the PVDF-HFP membrane and the corresponding EDS spectra with elemental composition. S2: performance characterization loading and release of a cationic dye (MB) into multilayers of (PAH/PAMAM)7.5-CaCO3 with different cross-linking degrees. S3: performance characterization loading and release of a cationic antibiotic (GS) into multilayers of (PAH/PAMAM)7.5-CaCO3 with different cross-linking degrees. [file 6331465.f1.docx]

# Supporting Information

**Layer-by-layer fabrication of PAH/PAMAM/nano-CaCO3 composite films and characterization for enhanced biocompatibility**

Naemi Tonateni. Shifeta 1,2, Shindume L. Hamukwaya 2,3*, An Qi 2, Huiying Hao 2, and Melvin Mununuri Mashingaidze3

1School of Science, University of Namibia, Windhoek 12010, Namibia.

2School of Materials Science and Technology, China University of Geosciences, Beijing 100083, People’s Republic of China.

3School of Engineering & the Built Environment, University of Namibia, Ongwediva 33004, Namibia.

E-mail: [nshifeta@unam.na](mailto:nshifeta@unam.na), [shamukwaya@unam.na](mailto:shamukwaya@unam.na), [an@cugb.edu.cn](mailto:an@cugb.edu.cn), [huiyinghaol@cugb.edu.cn](mailto:huiyinghaol@cugb.edu.cn), [mmashingaidze@unam.na](mailto:mmashingaidze@unam.na)

Correspondence should be addressed to; [shamukwaya@unam.na](mailto:shamukwaya@unam.na), (S.L. Hamukwaya)

## **1. SEM and TEM Morphological Characterizations of CaCO3 on the PVDF-HFP membrane**


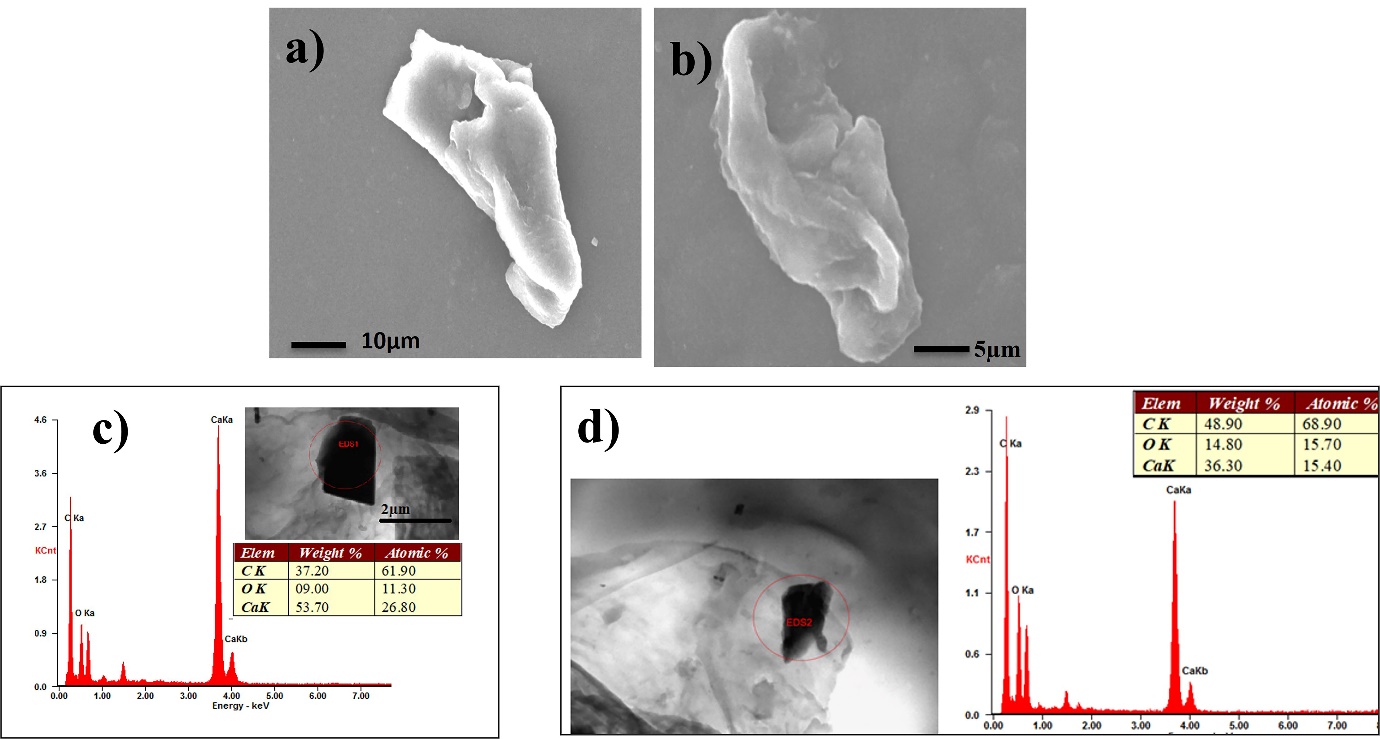


**S1**. Morphological Characterization of CaCO3 on the PVDF-HFP membrane. SEM images (a and b) of CaCO3 on the PVDF-HFP membrane on the medium cross-linked PAH/PAMAM)7.5 films. TEM images (c and d) of CaCO3 and their corresponding EDS spectra with elemental composition.

## **2. Performance Characterization- Loading and Release of a cationic dye (MB)**


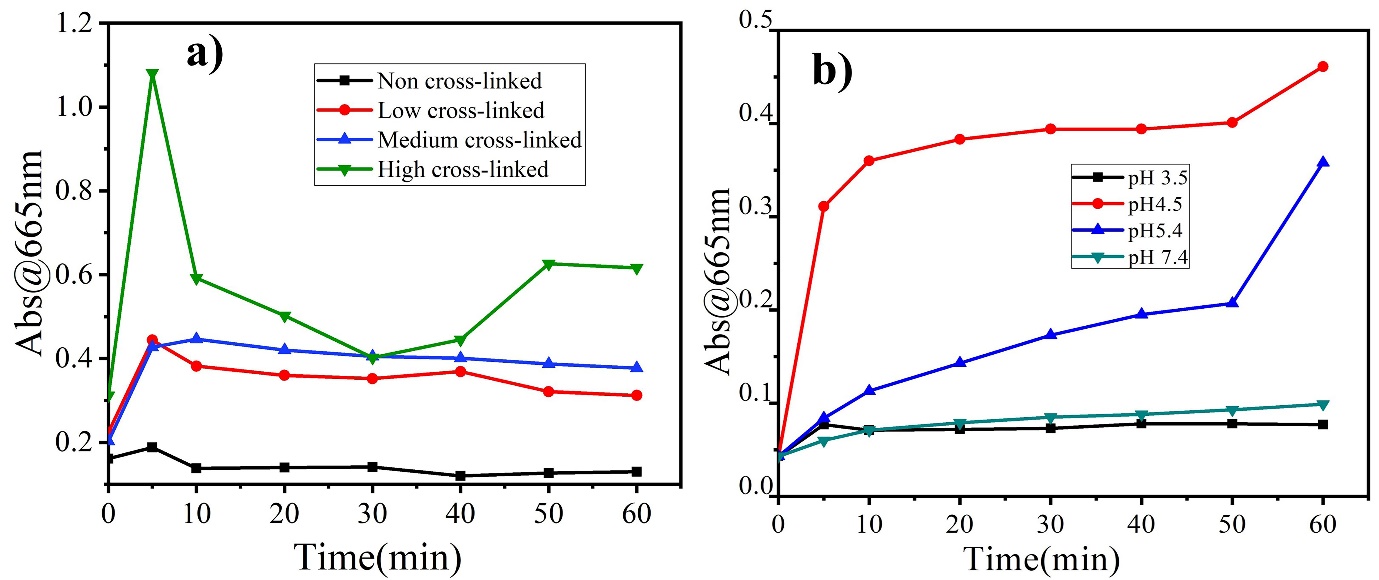


**S2.** Relationship of maximum absorbance (665nm) during the **a)** loading and **b)** release of MB (pH9) into multilayers of (PAH/PAMAM)7.5-CaCO3 with different cross-linking degrees.

## **3. Performance Characterization- Loading and Release of a cationic antibiotic (GS).**


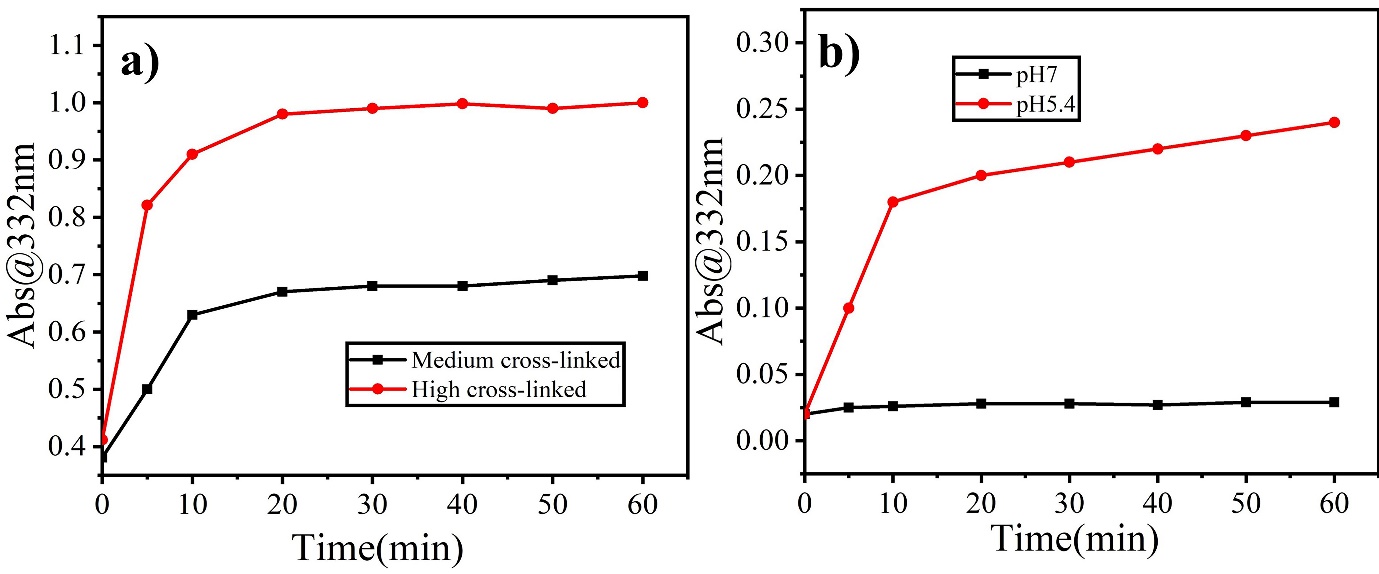


**S3.** Relationship of maximum absorbance (332nm) during the (a)loading and (b) release of Gentamycin sulfate (pH7) into multilayers of (PAH/PAMAM)7.5-CaCO3with ***different cross-linking degrees***.
